# Supplementary material for: Differential regulation of polarized synaptic vesicle trafficking and synapse stability in neural circuit rewiring in Caenorhabditis elegans
Source: PubMed Central journal article supplement (PMC5500376; doi:10.1371/journal.pgen.1006844), 2017-06-21

A

*ju1279*

*C. e* DHC-1 246 NRWVKEIRKVTQLERD**P**SSGTSLQEMTFWLNLERALLKISQKRD 289  
*H. s* DYNC1H1 249 NRWIREIQKVTKLDRD**P**ASGTALQEISFWLNLERALYRIQEKRE 292  
*M. m* DYNC1H1 249 NRWIREIQKVTKLDRD**P**ASGTALQEISFWLNLERALYRIQEKRE 292

B

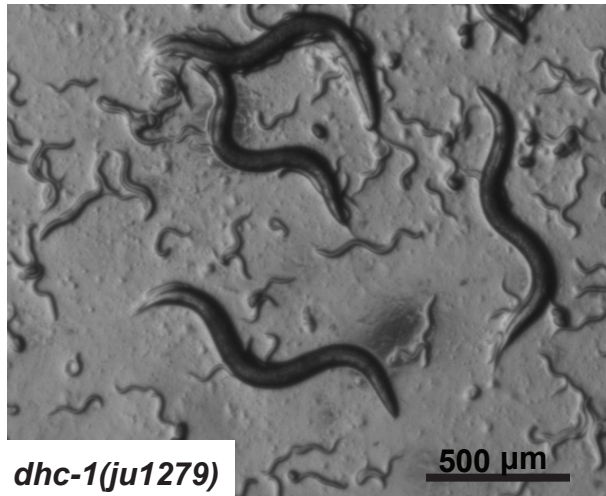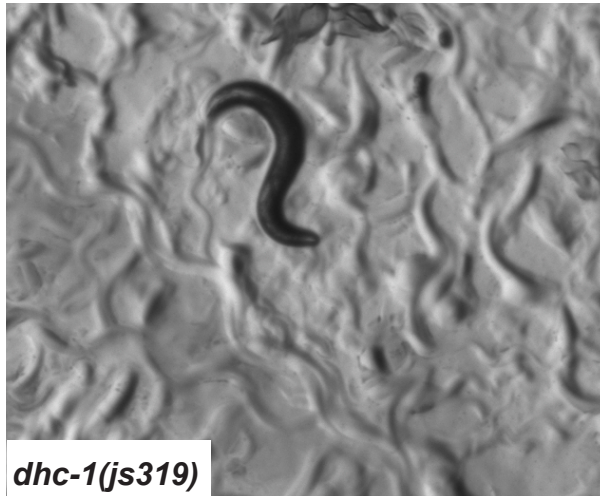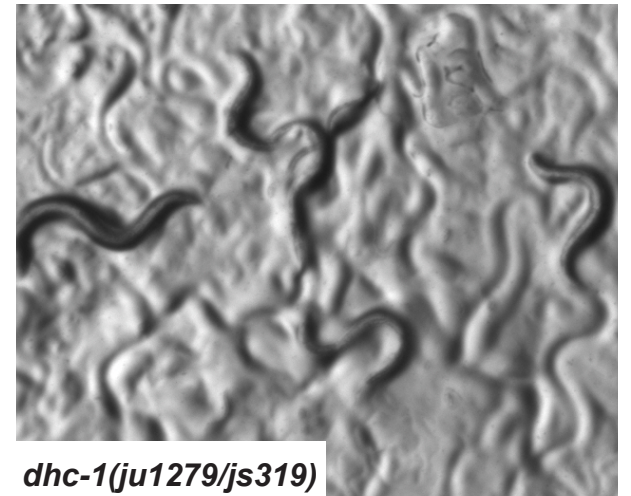

C

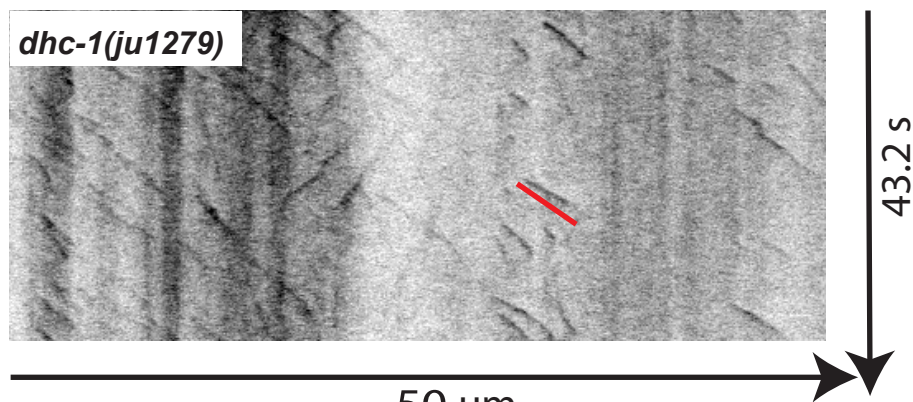

D

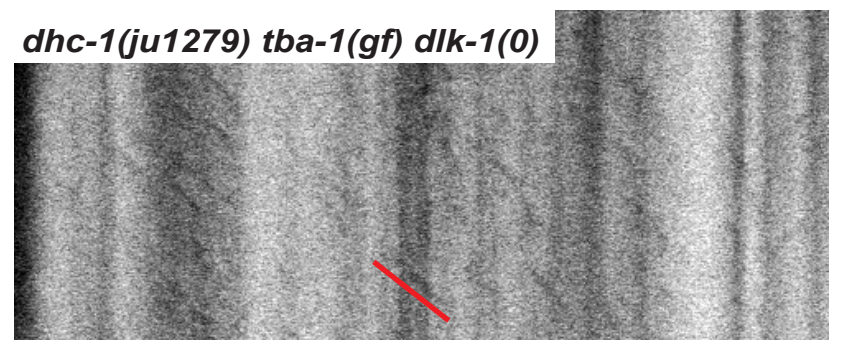

E

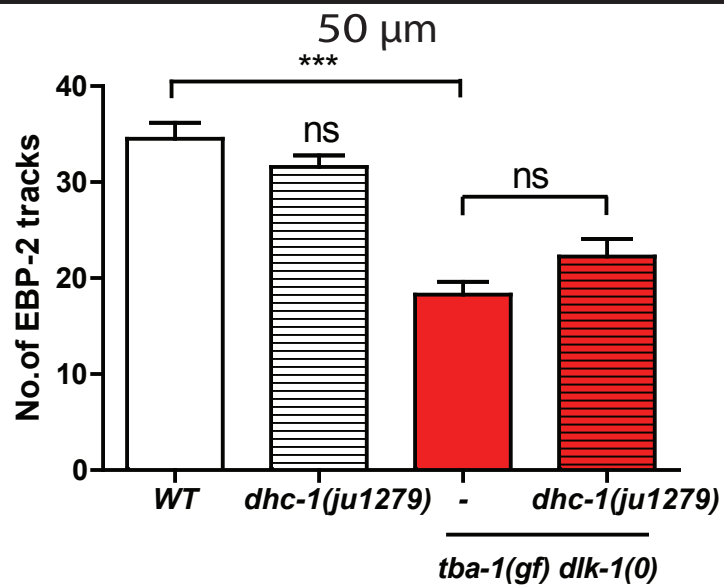

F

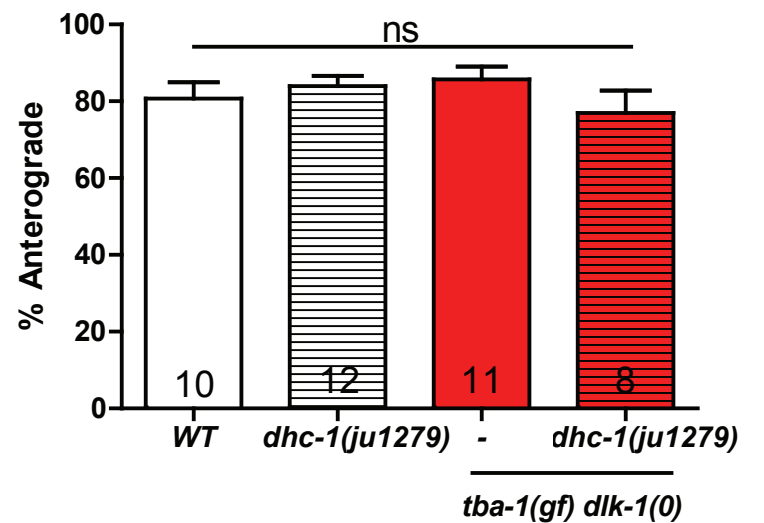

G

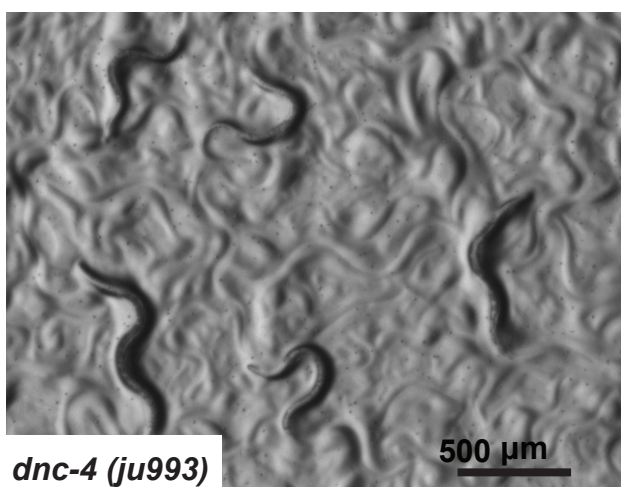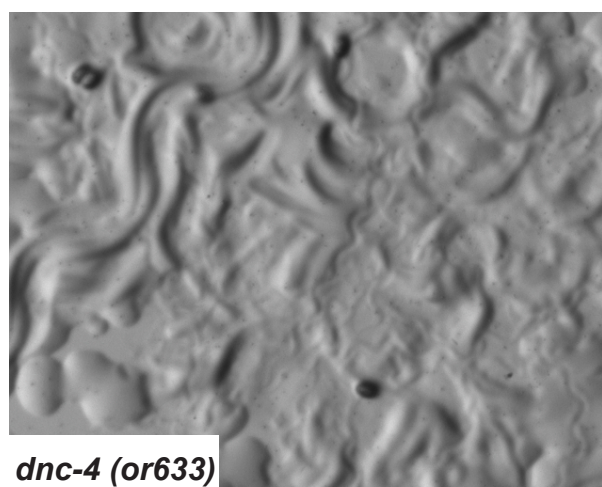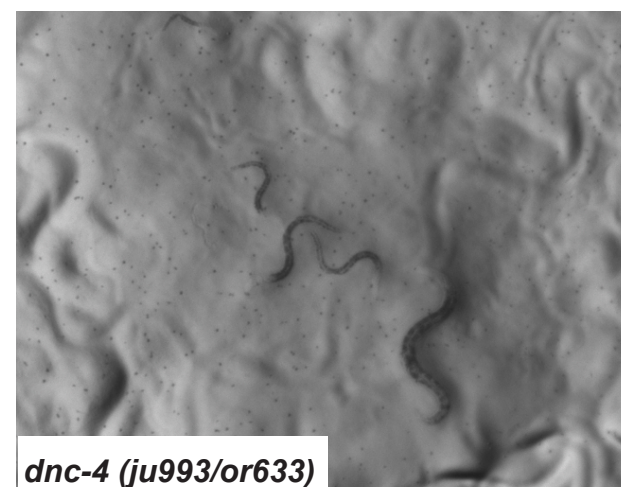

Supplement: pgen.1006844.s007.pdf [file pgen.1006844.s007.pdf]
