# Supplementary material for: Differential regulation of polarized synaptic vesicle trafficking and synapse stability in neural circuit rewiring in Caenorhabditis elegans
Source: PubMed Central journal article supplement (PMC5500376; doi:10.1371/journal.pgen.1006844), 2017-06-21

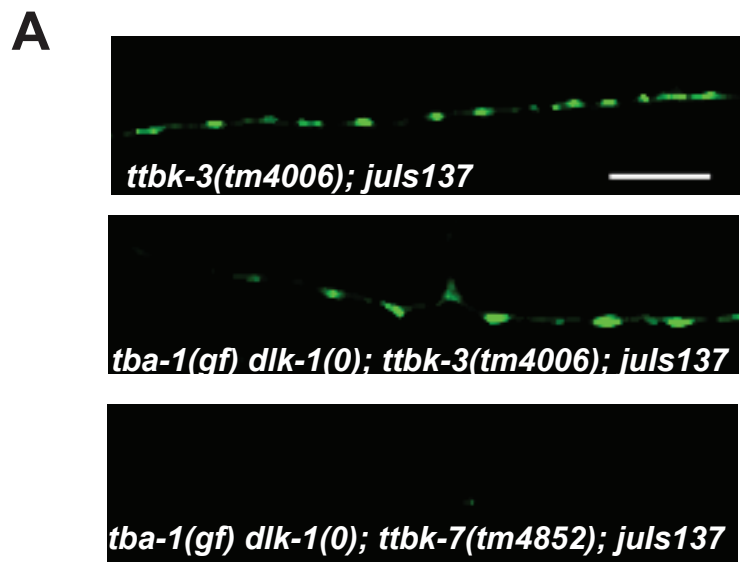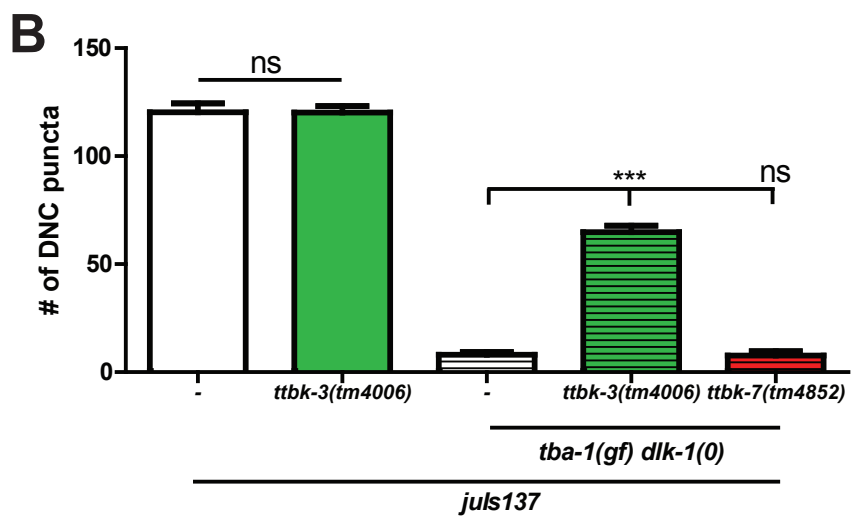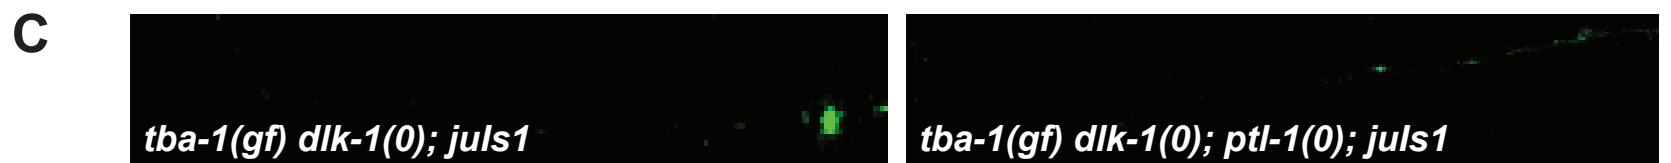

**D** Punc-25-TTBK-3-GFP (VNC)

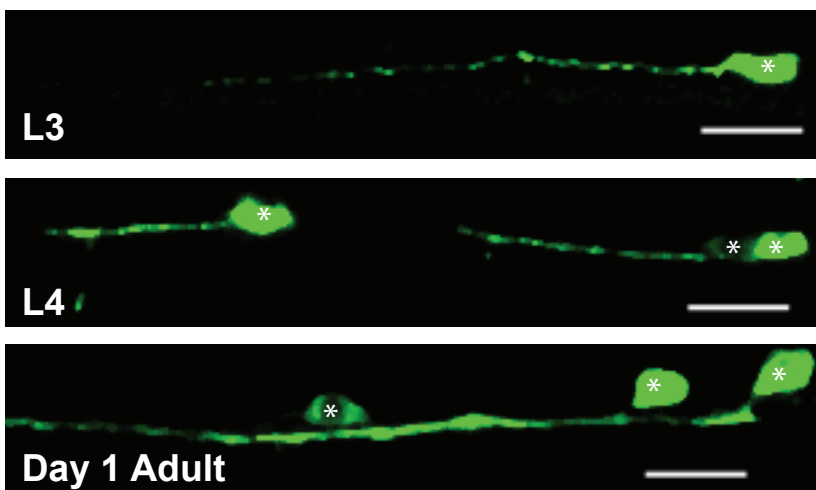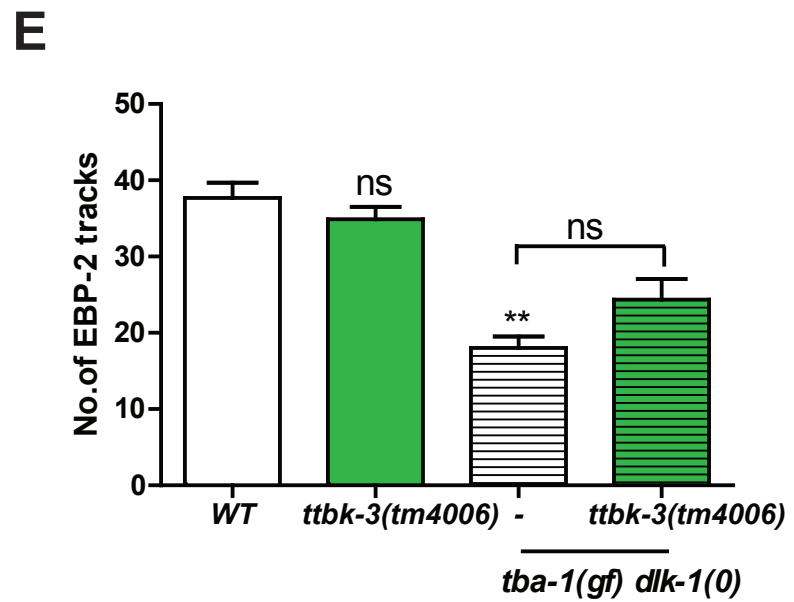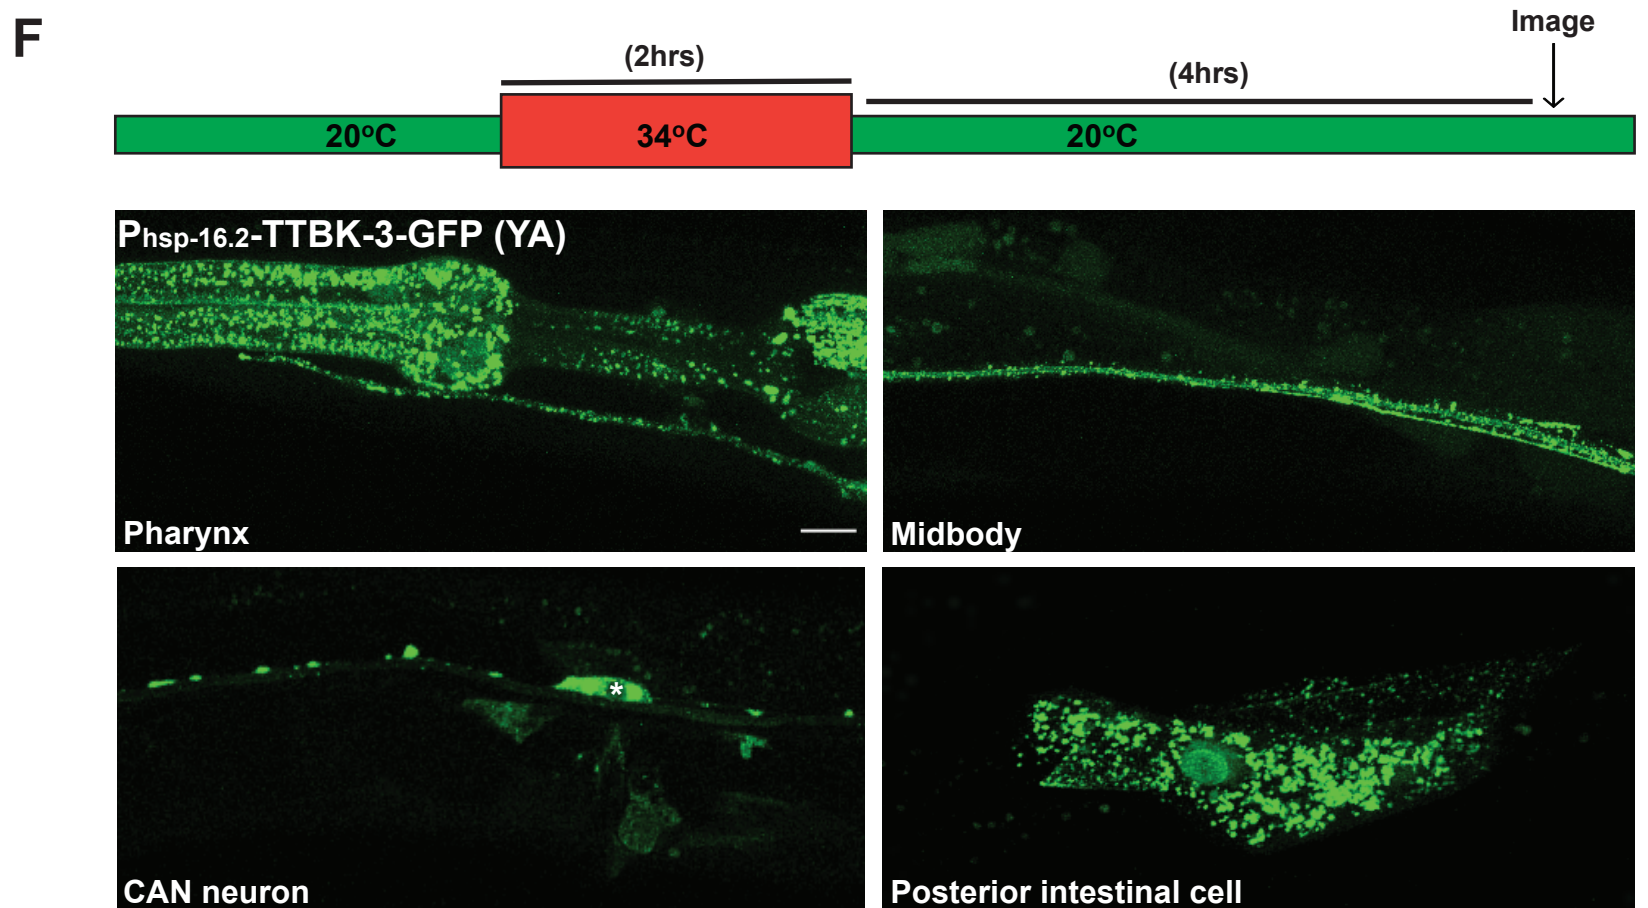

Supplement: pgen.1006844.s008.pdf [file pgen.1006844.s008.pdf]
